# Supplementary material for: SARS-CoV-2 m-RNA Vaccine Response in Immunocompromised Patients: A Monocentric Study Comparing Cancer, People Living with HIV, Hematopoietic Stem Cell Transplant Patients and Lung Transplant Recipients
Source: MDPI journal article supplement (doi:10.3390/vaccines11081284), 2023-07-26
Supplement: s1 [file s1]

## SUPPLEMENTARY DATA

*Supplementary Table S1: Characteristics of cancer patients*

| Variables                      | Cancer<br>(n=232) |
|--------------------------------|-------------------|
| Solid tumor                    |                   |
| yes                            | 196 (84%)         |
| no                             | 36 (16%)          |
| Cancer stage                   |                   |
| 0                              | 1 (1%)            |
| 1                              | 5 (4%)            |
| 2                              | 9 (7%)            |
| 3                              | 10 (8%)           |
| 4                              | 106 (81%)         |
| missing values                 | 101               |
| <b>Cancer treatment</b>        |                   |
| Chemotherapy                   |                   |
| yes                            | 83 (36%)          |
| Alkylating agents              | 57 (25%)          |
| Antimetabolites                | 44 (19%)          |
| Anti-tumor antibiotics         | 10 (4%)           |
| Topoisomerase inhibitors       | 21 (9%)           |
| Mitotic inhibitors             | 26 (11%)          |
| no                             | 149 (64%)         |
| Surgery                        |                   |
| yes                            | 32 (14%)          |
| no                             | 200 (86%)         |
| Radiation                      |                   |
| yes                            | 48 (21%)          |
| no                             | 184 (79%)         |
| Hormonal therapy               |                   |
| yes                            | 30 (13%)          |
| no                             | 202 (87%)         |
| Immunotherapy                  |                   |
| yes                            | 37 (16%)          |
| no                             | 195 (84%)         |
| Corticosteroids/target therapy |                   |
| yes                            | 53 (23%)          |
| no                             | 179 (77%)         |
| Follow-up                      |                   |
| yes                            | 67 (29%)          |
| no                             | 165 (71%)         |

***Supplementary Table S2: Characteristics of PLWH***

| <b>variables</b>                  | <b>PLWH (n=131)</b>  |
|-----------------------------------|----------------------|
| Antiretroviral therapy            |                      |
| yes                               | 131 (100%)           |
| CDC stage                         |                      |
| A                                 | 81 (63%)             |
| B                                 | 25 (20%)             |
| C                                 | 22 (17%)             |
| missing values                    | 3                    |
| CD4-T cell (mean; SD)             | 646.9 ( $\pm$ 294.5) |
| CD4-T cell (%) (mean; SD)         | 34.2 ( $\pm$ 10.9)   |
| HIV-1 RNA result                  |                      |
| undetectable, $\leq$ 20 copies/ml | 108 (84%)            |
| detectable, $>$ 20 copies/ml      | 20 (16%)             |
| missing values                    | 3                    |
| HIV-1 RNA (mean; SD)              | 42.3 ( $\pm$ 33.7)   |
| missing values                    | 111                  |

*PLWH: people living with HIV*

**Supplementary Table S3: Characteristics of HSCT patients**

| Variables                                            | HSCT<br>(n=126)    |
|------------------------------------------------------|--------------------|
| Months between transplant and vaccine (median; Q1-3) | 15.31 (6.7 - 27.3) |
| Active GVHD                                          |                    |
| Acute GvHD                                           | 2 (2%)             |
| Chronic GvHD                                         | 35 (28%)           |
| No active GvHD                                       | 89 (71%)           |
| Active malignancies                                  |                    |
| yes                                                  | 8 (6%)             |
| no                                                   | 118 (94%)          |
| CD4-T cell (median; Q1-3)                            | 226 (111 - 423)    |
| missing values                                       | 13                 |
| <b>Immunosuppressive drugs</b>                       |                    |
| Cyclosporine                                         |                    |
| yes                                                  | 6 (5%)             |
| no                                                   | 120 (95%)          |
| Prednisone $\geq$ 10mg/d                             |                    |
| yes                                                  | 11 (9%)            |
| no                                                   | 115 (91%)          |
| Tacrolimus                                           |                    |
| yes                                                  | 14 (11%)           |
| no                                                   | 112 (89%)          |
| MMF                                                  |                    |
| yes                                                  | 2 (2%)             |
| no                                                   | 124 (98%)          |
| Ruxolitinib                                          |                    |
| yes                                                  | 16 (13%)           |
| no                                                   | 110 (87%)          |
| <b>Current oncologic treatment</b>                   |                    |
| Sorafenib                                            |                    |
| no                                                   | 126 (100%)         |
| Midostaurine                                         |                    |
| no                                                   | 126 (100%)         |
| 5azacytidine                                         |                    |
| yes                                                  | 6 (5%)             |
| no                                                   | 120 (95%)          |
| Venetoclax                                           |                    |
| yes                                                  | 4 (3%)             |
| no                                                   | 122 (97%)          |
| other                                                |                    |
| yes                                                  | 1 (1%)             |
| no                                                   | 125 (99%)          |
| Rituximab < 6 months                                 |                    |
| yes                                                  | 5 (4%)             |
| no                                                   | 121 (96%)          |

HSCT: hematopoietic stem cell transplantation

**Supplementary Table S4: Lung transplant patients**

| Variables                                                 | Lung transplant<br>(n=39) |
|-----------------------------------------------------------|---------------------------|
| Months between lung transplant and vaccine (median; Q1-3) | 81.6 (28.5 - 120.6)       |
| <b>Etiology of lung disease before transplant</b>         |                           |
| Bronchiectasis                                            | 3 (8%)                    |
| COPD                                                      | 18 (46%)                  |
| Cystic fibrosis                                           | 7 (18%)                   |
| Interstitial lung disease                                 | 9 (23%)                   |
| Pulmonary hypertension                                    | 2 (5%)                    |
| Cortico Steroid Inhalation (CSI)                          |                           |
| yes                                                       | 2 (5%)                    |
| no                                                        | 37 (95%)                  |
| Non-Invasive Ventilation (NIV)                            |                           |
| yes                                                       | 1 (3%)                    |
| no                                                        | 38 (97%)                  |
| O2 received                                               |                           |
| yes                                                       | 1 (3%)                    |
| no                                                        | 38 (97%)                  |
| High dose steroids during the last 12 months              |                           |
| Yes                                                       | 11 (28%)                  |
| No                                                        | 28 (72%)                  |
| Triple immunosuppression                                  |                           |
| Yes                                                       | 33 (85%)                  |
| No                                                        | 6 (15%)                   |
| <b>Ongoing immunosuppressive treatments</b>               |                           |
| Prednisone                                                |                           |
| yes                                                       | 34 (87%)                  |
| no                                                        | 5 (13%)                   |
| Dosage of Prednisone (median; Q1-3)                       | 5 (5 - 5)                 |
| missing values                                            | 5                         |
| Tacrolimus                                                |                           |
| yes                                                       | 35 (90%)                  |
| no                                                        | 4 (10%)                   |
| Dosage of Tacrolimus (median; Q1-3)                       | 4 (2.5 - 6)               |
| missing values                                            | 4                         |
| Everolimus                                                |                           |
| yes                                                       | 4 (10%)                   |
| no                                                        | 35 (90%)                  |
| Dosage of Everolimus (median; Q1-3)                       | 2.25 (1.4 - 3.5)          |
| missing values                                            | 35                        |
| Azathioprine                                              |                           |
| yes                                                       | 1 (3%)                    |
| no                                                        | 38 (97%)                  |
| Mycophenolate mofetil                                     |                           |
| yes                                                       | 37 (95%)                  |
| no                                                        | 2 (5%)                    |
| Dosage of Mycophenolate (median; Q1-3)                    | 1440 (780 - 2000)         |
| missing values                                            | 2                         |
